# Supplementary material for: Floating ZnO QDs-Modified TiO2/LLDPE Hybrid Polymer Film for the Effective Photodegradation of Tetracycline under Fluorescent Light Irradiation: Synthesis and Characterisation
Source: MDPI journal article supplement (doi:10.3390/molecules26092509), 2021-04-25
Supplement: s1 [file s1]

# Floating ZnO QDs-modified TiO<sub>2</sub>/ LLDPE hybrid polymer film for the effective photodegradation of tetracycline under fluorescent light irradiation: Synthesis and Characterization

Anwar Iqbal<sup>a\*</sup>, Usman Saidu<sup>a</sup>, Srimala Sreekantan<sup>b</sup>, Noorfatimah Yahaya<sup>c</sup>, Mohammad Norazmi Ahmad<sup>d</sup>, R. Jothi Ramalingam<sup>e\*</sup>, and Lee D. Wilson<sup>f\*</sup>

<sup>1</sup> School of Chemical Sciences, Universiti Sains Malaysia, Penang 11800, Malaysia, usmaniyya2000@gmail.com (U.S.); farook@usm.my (F.A.)

<sup>2</sup> School of Materials & Mineral Resources Engineering, Universiti Sains Malaysia, Engineering Campus, 14300 Nibong Tebal, Seberang Perai Selatan, Pulau Pinang, Malaysia, srimala@usm.my

<sup>3</sup> Integrative Medicine Cluster, Advanced Medical and Dental Institute, Universiti Sains Malaysia, 13200, Kepala Batas, Pulau Pinang, Malaysia, noorfatimah@usm.my

<sup>4</sup> Experimental and Theoretical Research Lab, Department of Chemistry, Kulliyyah of Science, 25200 Kuantan, Pahang, Malaysia, mnorazmi@iiium.edu.my

<sup>5</sup> Surfactant Research Chair, Chemistry Department, College of Science, King Saud University, P.O. Box. 2455, Riyadh 11451, Kingdom of Saudi Arabia

<sup>6</sup> Department of Chemistry, University of Saskatchewan, 110 Science Place, Room 165 Thorvaldson Building, Saskatoon, SK. Canada S7N 5C9

\* Correspondence: anwariqbal@usm.my (A.I.) Tel. +604-653 3565; jrabathar@ksu.edu.sa (R.J.R.); lee.wilson@usask.ca (L.D.W.) Tel. +1-306-966-2961

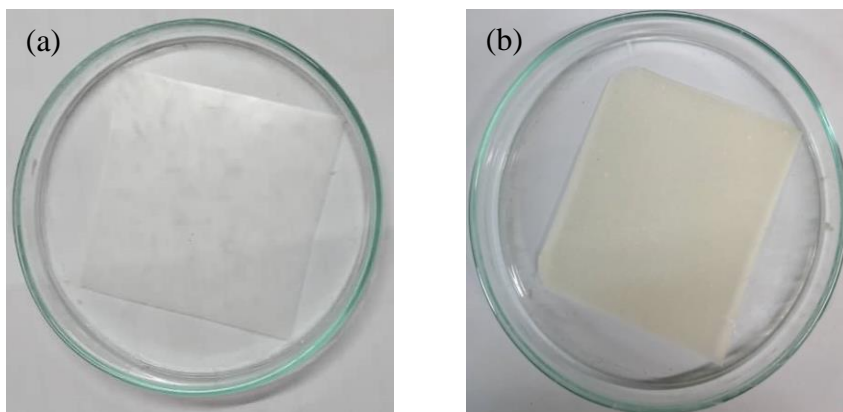

**Figure S1:** Photographs of (a) bare LLDPE and (b) 8%-ZT@LLDPE hybrid films.

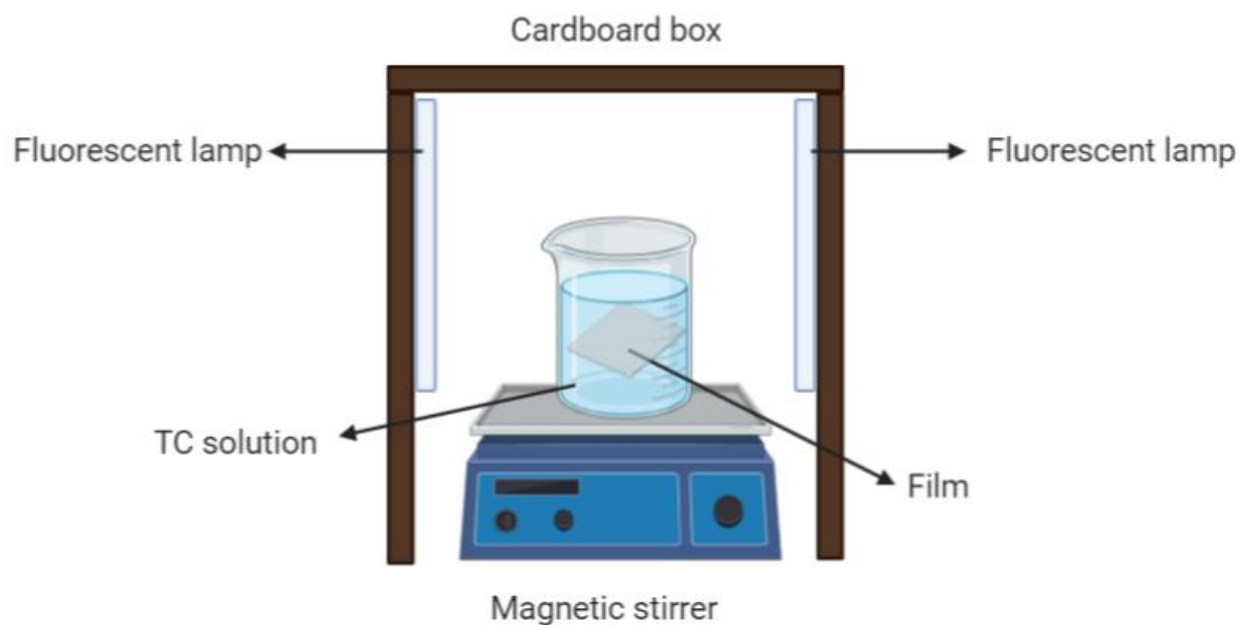

**Figure S2:** Schematic diagram of the photocatalytic reactor for the degradation of TC using the hybrid LLDPE film.

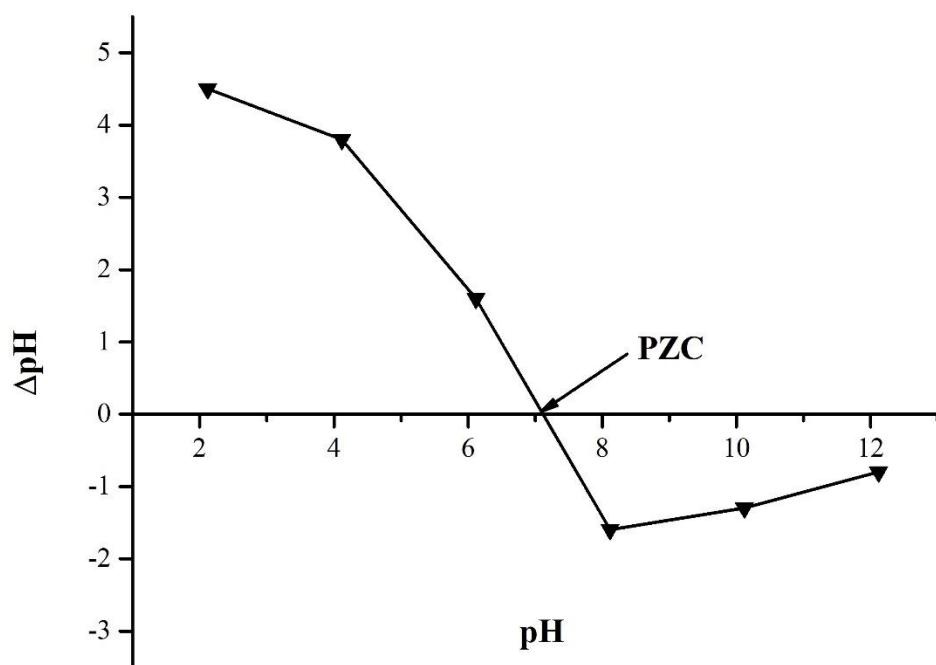

**Figure S3:** The pH point of zero charge ( $pH_{PZC}$ ) of ZT nanocomposites photocatalyst.

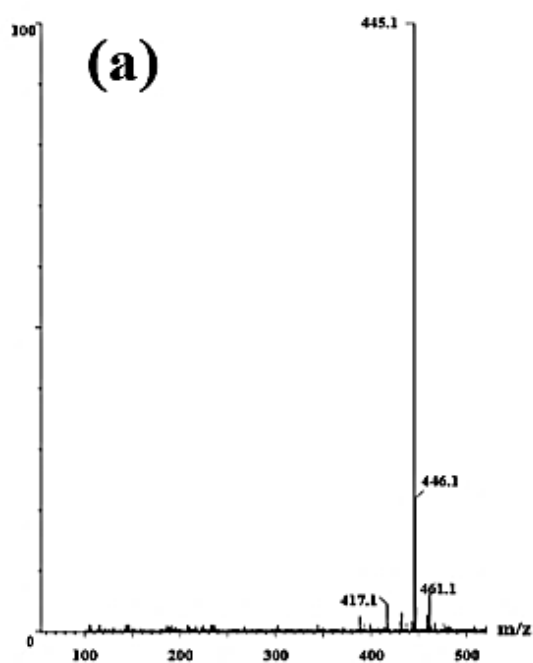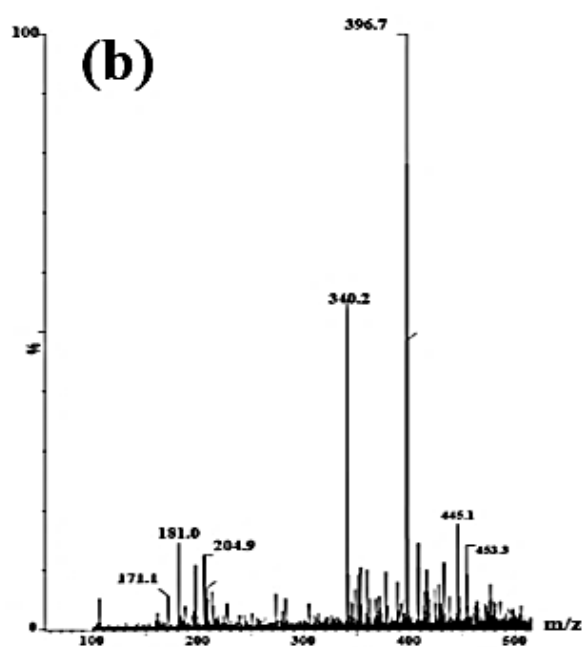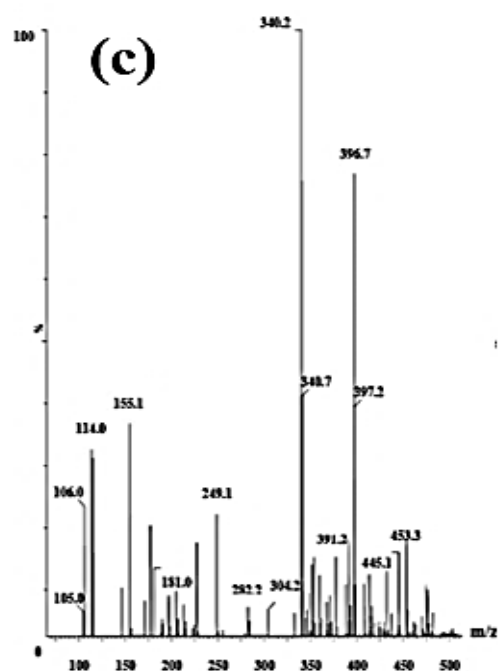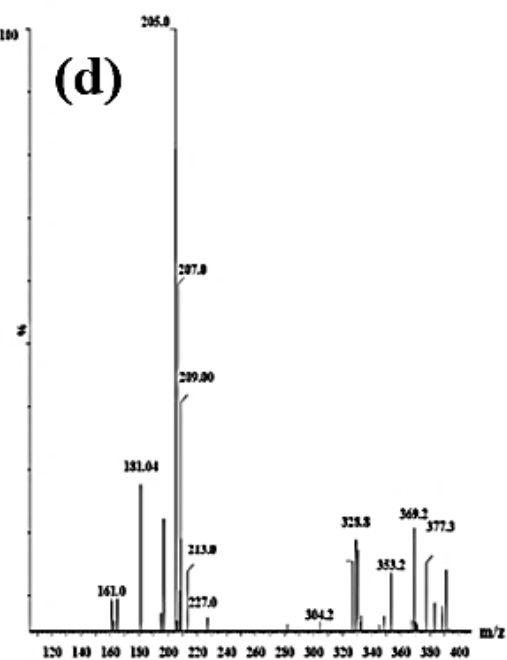

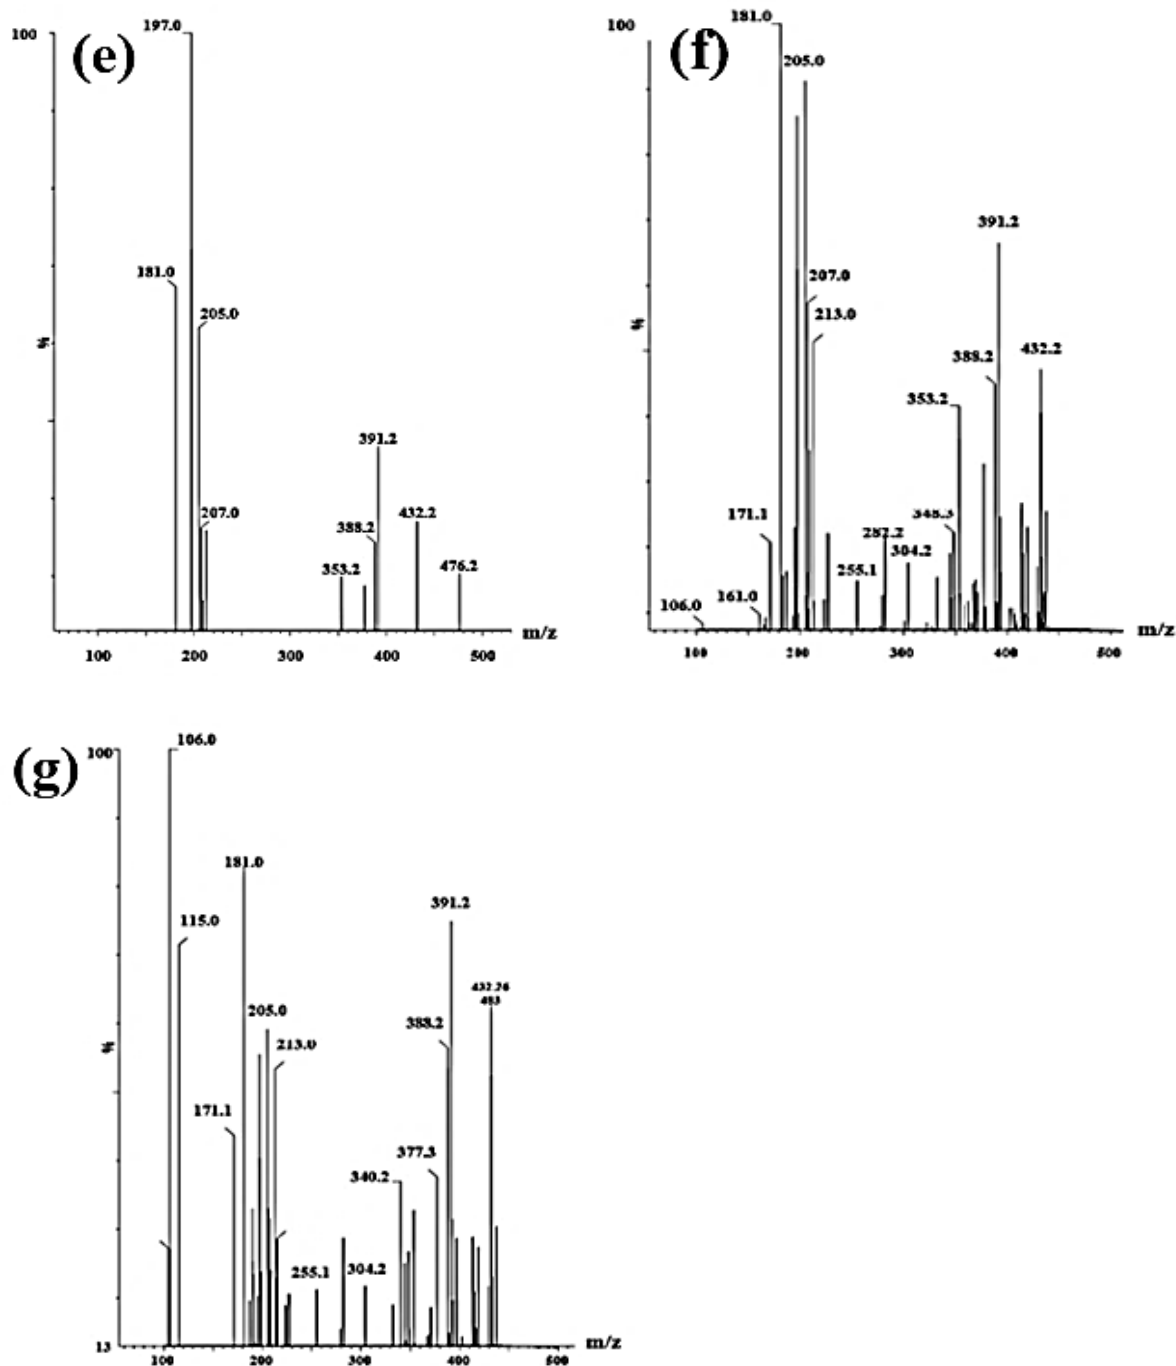

**Figure S4:** Mass spectra of (a) TC and (b) its intermediates during degradation in the presence of 8%-ZT@LLDPE
